# Supplementary material for: Efficient Selection of DNA Aptamers with High Affinity and Specificity to GPCRs via Functional Extracellular Vesicles
Source: Research Square preprint supplement (doi:10.21203/rs.3.rs-6638225/v1), 2025-07-19
Supplement: Supplementary file 1 [file d6315796982682586601e730.docx]

**Supplementary Information**

**Efficient Selection of DNA Aptamers with High Affinity and Specificity to GPCRs via Functional Extracellular Vesicles**

Mitsushi J. Ikemoto,Yuji Kamikuo, Daisuke Uta, Kengo Kirinoki, Mari Kiriyama, Takumi Miyajima,, Hakushun Sakairi, Masanobu Kano,Takashi Sakurai, and Toshihide Tabata

**To whom correspondence should be addressed:**

Mitsushi J. Ikemoto, Ph.D. e-mail: m.ikemoto.sci@gmail.com

Toshihide Tabata, Ph.D. e-mail: ttabata@eng.u-toyama.ac.jp

Yuji Kamikubo, Ph.D.e-mail: ykamiku@juntendo.ac.jp

**This supplementary file includes:**

Supplementary Information Text

Supplementary Figures S1 and S2

Supplementary Table S1

**Supplementary Information Text**

**Improvement of Cell-SELEX**

We compared the merits of EV-SELEX with those of Cell-SELEX. For fairness of comparison, we first optimized the Cell-SELEX procedure for GPCR-targeting aptamers (herein referred to as iCell-SELEX). First, we increased the MOR expression levels in stable, conditional HEK293 cells expressing HA-tagged MOR (HA-MOR) using a commercially available Flp-In system, which incorporates the target gene at a specific site in the genome to regulate its expression in a Tet-dependent manner (Fig. 1a). Second, we suppressed the emergence of nonspecific ssDNAs through two steps of counter-selection using F293-HA-MOR(−) cells that did not express MOR, and Tet-stimulated F293-HA-d opioid receptor (DOR)(+) cells that expressed DOR, a major MOR homolog variant (Supplementary Fig. S1a). Last, to select high-affinity ssDNAs for MOR, we tightly adjusted the screening conditions (binding buffer components, washing conditions, or FBS absorption) (Supplementary Fig. S1b). Using this iCell-SELEX system, we screened for ssDNAs binding to MOR. To determine the endpoint of the screening cycles, we monitored the enrichment process of the MOR-binding ssDNAs by analyzing the changes in the melting-curve profiles every three cycles. We decided to terminate the enrichment process at Round 24 based on these profiles (Supplementary Fig. S1c).

**PCR primers**

All PCR primers used in this study are listed in Supplementary Table S1.

**Supplementary Fig. S1: Screening of MOR-specific DNA aptamers by iCell-SELEX.**

**a,** Overview of iCell-SELEX for selecting MOR-specific DNA aptamers. **b**, Screening conditions for each cycle of iCell-SELEX. **c**, Results of the melting-curve analysis of the enriched ssDNA pools in each cycle of iCell-SELEX. The melting-curve profile drastically changed after Round 24.

**Supplementary Fig. S2: Screening of MOR-specific DNA aptamers by EV-SELEX.**

**a**, Screening conditions in each round of EV-SELEX to identify MOR-specific DNA aptamers. The reaction conditions (time, temperature, and FBS concentration) were optimized to enhance the screening bias to enrich ssDNAs bound to MOR-expressing Tet-induced F293-HA-MOR cells. Final candidate DNA aptamers were selected by setting the selection conditions more stringently in the late cycles. **b**, Results of the melting-curve analysis of the enriched ssDNA pools at each round of EV-SELEX. A drastic change in the melting-curve profile was observed after four rounds of EV-SELEX.

**Supplementary Table S1: PCR Primers**

All PCR primers used in this study. Underlining indicates additional nucleotide sequences for plasmid vector insertion. Double underlining shows the specific molecular tag sequences.
